# Supplementary material for: miR-34a: a new player in the regulation of T cell function by modulation of NF-κB signaling
Source: PubMed Central journal article supplement (PMC6362007; doi:10.1038/s41419-018-1295-1), 2019-01-18

# SFig. 1

## A

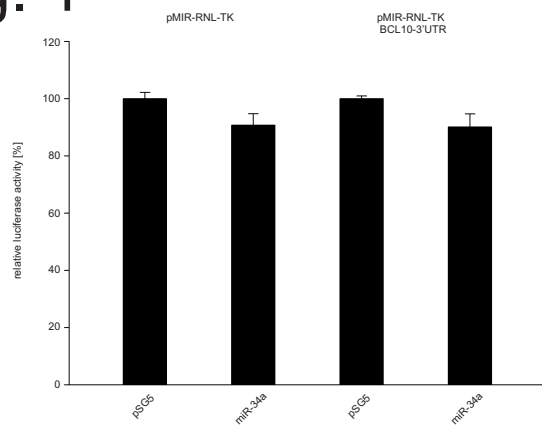

## B

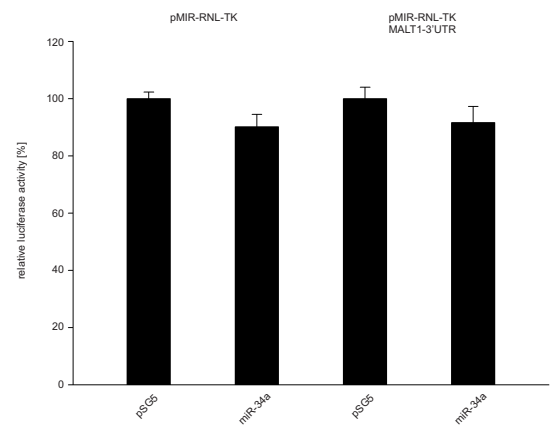

## C

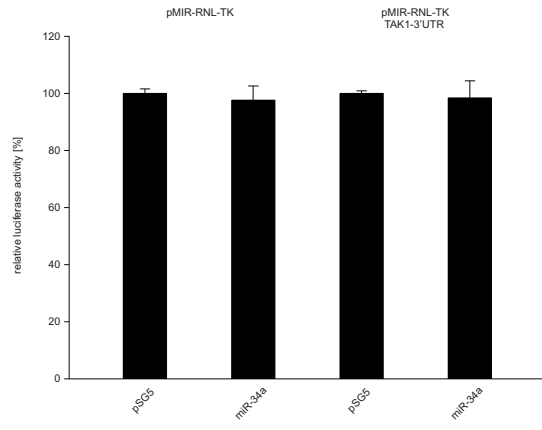

## D

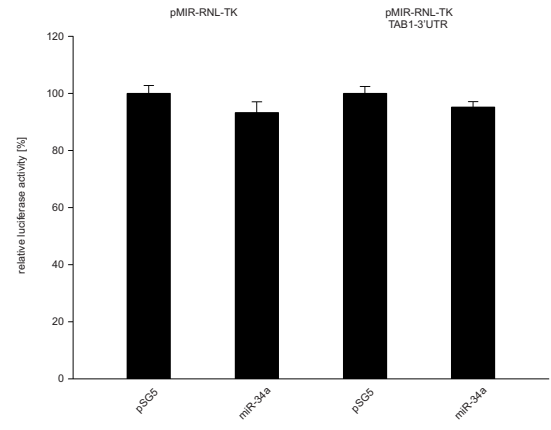

## E

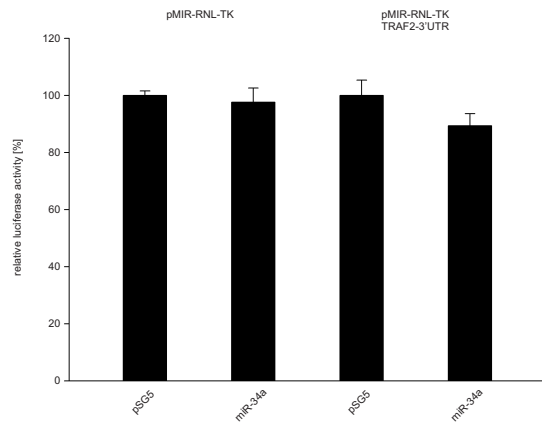

## F

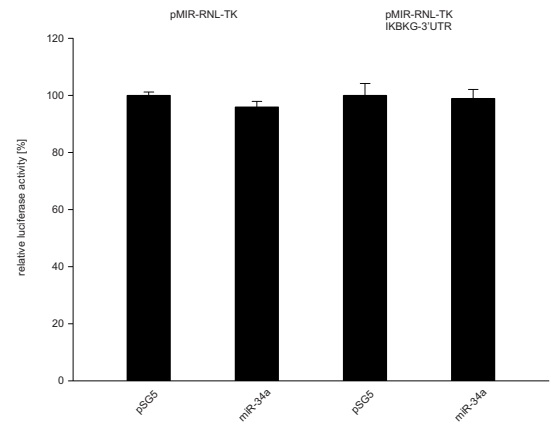

## G

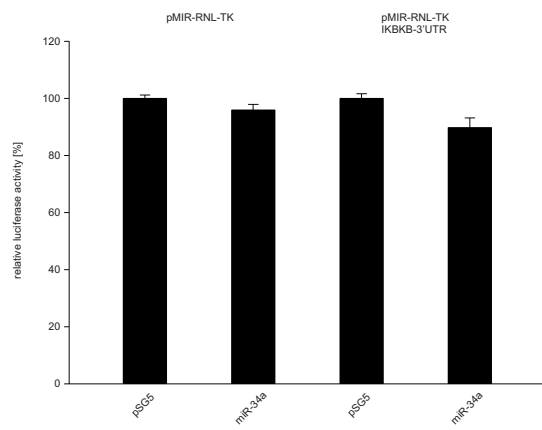

## H

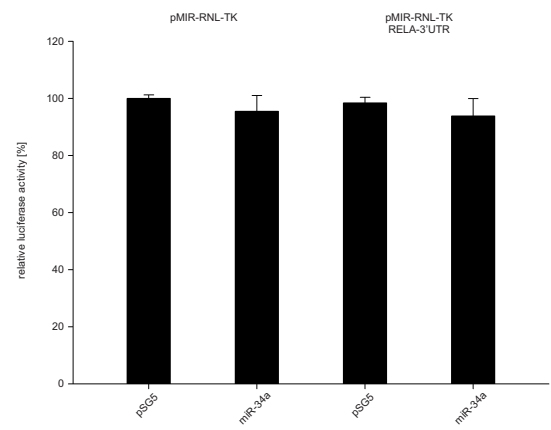

## I

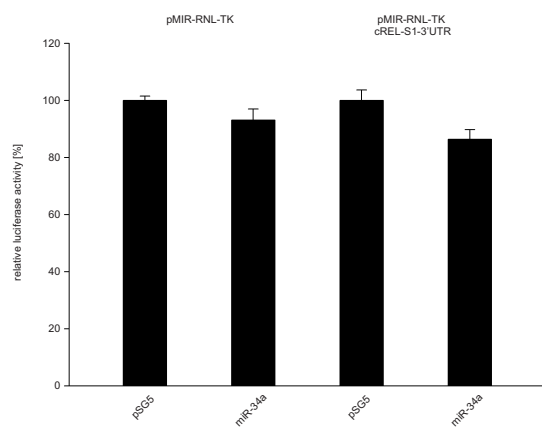

## J

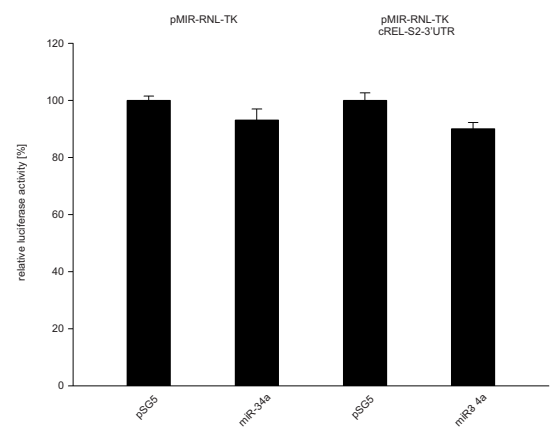

# SFig. 2

## A

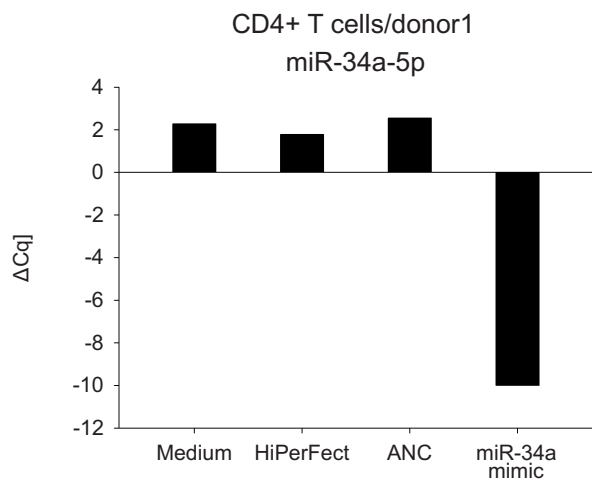

## B

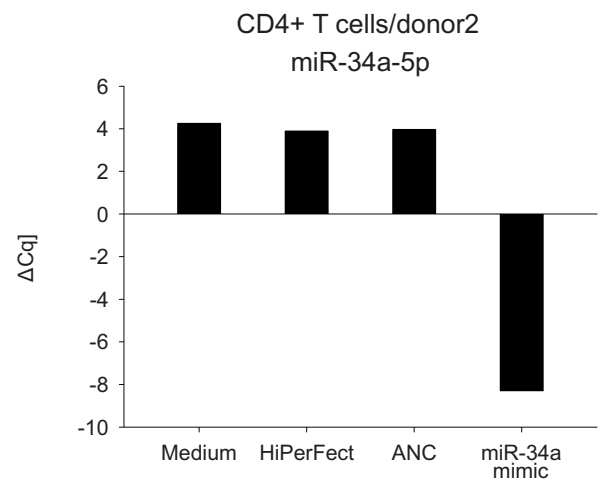

## C

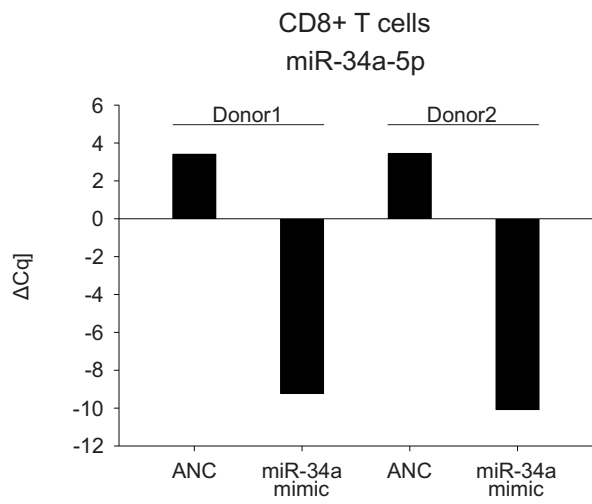

# SFig. 3

## A

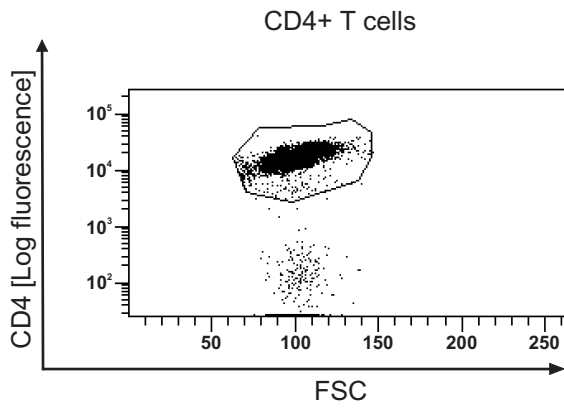

## B

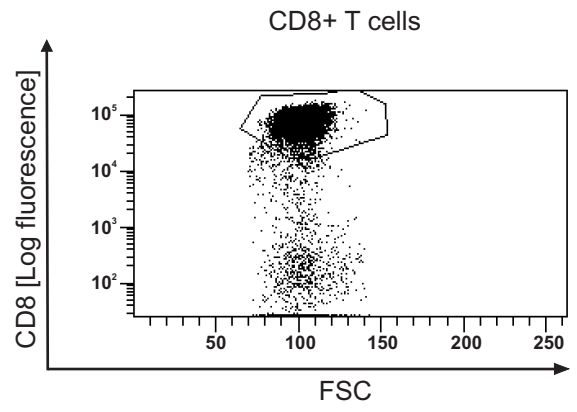

## C

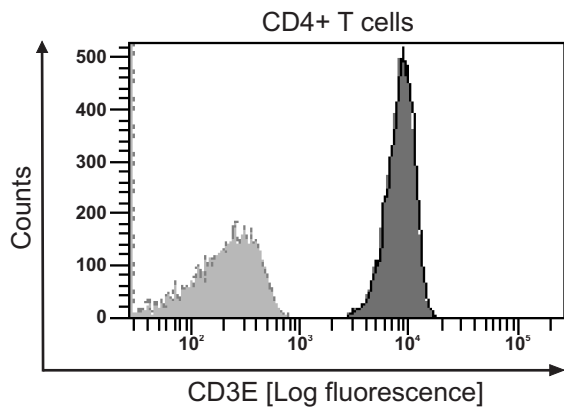

## D

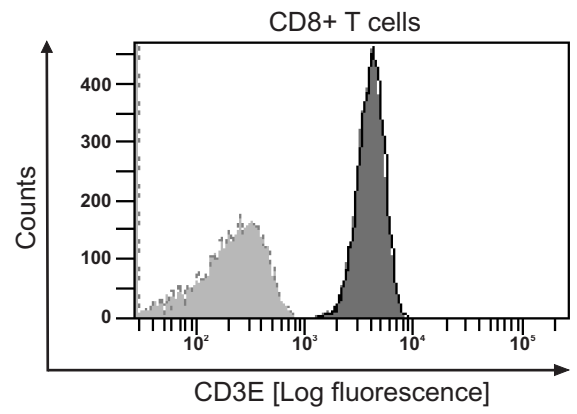

## E

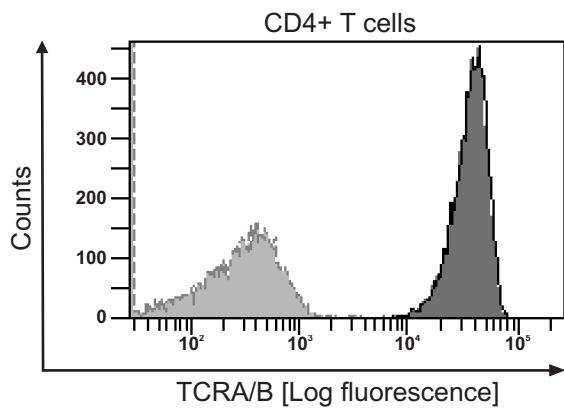

## F

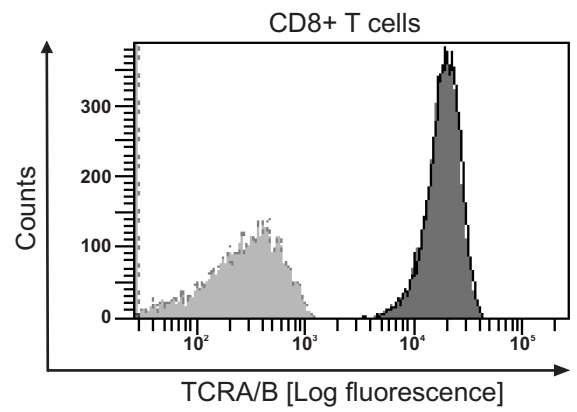

# SFig. 4

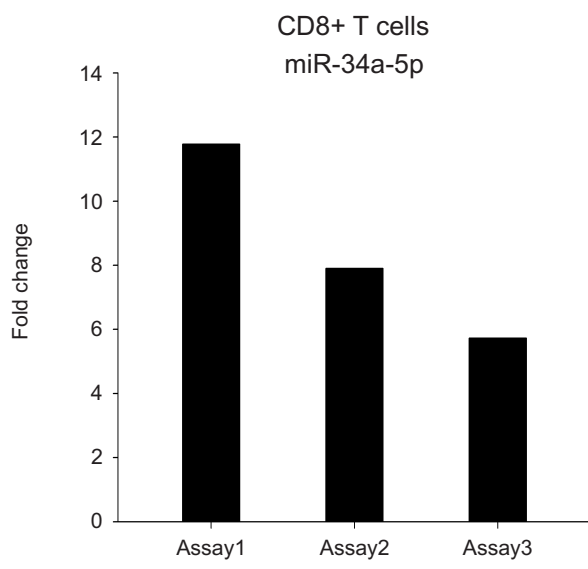

# SFig. 5

## A

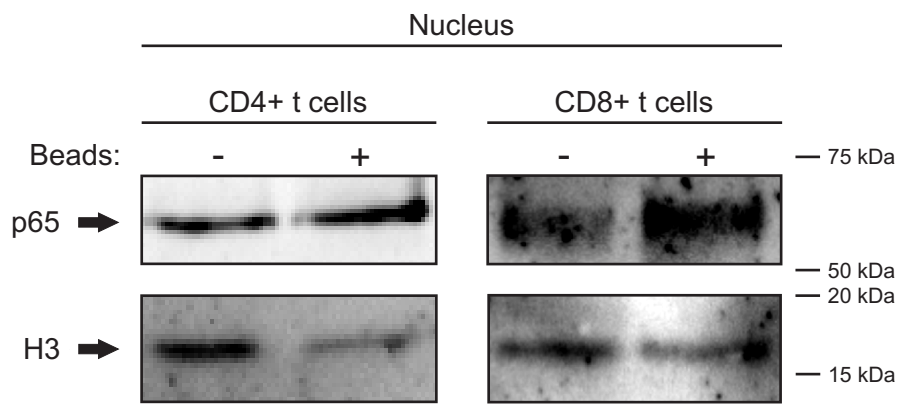

## B

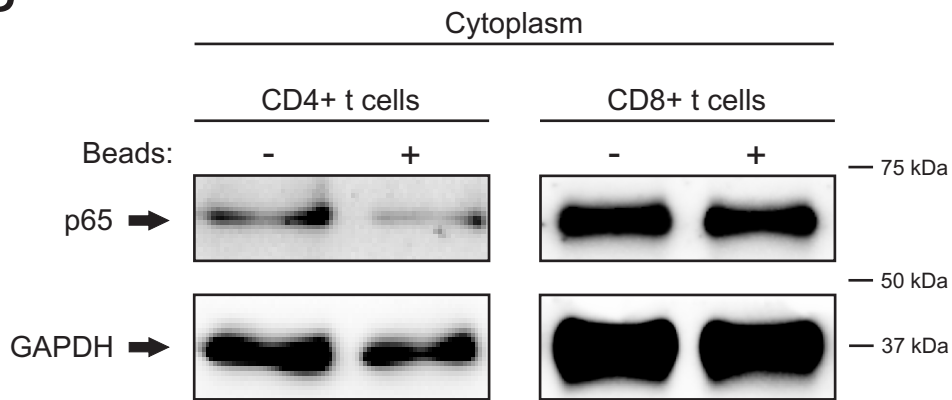

## C

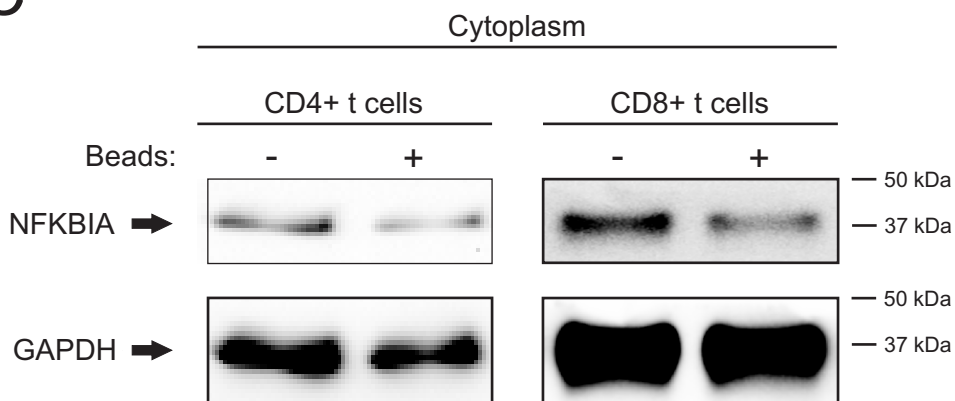

Supplement: 41419_2018_1295_MOESM1_ESM.pdf [file 41419_2018_1295_MOESM1_ESM.pdf]
