# Supplementary material for: miR-34a: a new player in the regulation of T cell function by modulation of NF-κB signaling
Source: PubMed Central journal article supplement (PMC6362007; doi:10.1038/s41419-018-1295-1), 2019-01-18
Supplement: 41419_2018_1295_MOESM2_ESM.pdf [file 41419_2018_1295_MOESM2_ESM.pdf]

**Supplementary Table 1**

| <b>cloning primers</b>     |                                                                     |
|----------------------------|---------------------------------------------------------------------|
| <b>name</b>                | <b>sequence</b>                                                     |
| 5'-cREL TS1-Spel           | <u>ggactagtc</u> cagaaggcagttgaagtgag                               |
| 3'-cRELTS1-Sacl            | cgagctcgaagagatgatggtggcttgg                                        |
| 5'-cREL TS2-Spel           | <u>ggactagtg</u> aactctacttgtgcactgg                                |
| 3'-cREL TS2-Sacl           | cgagctccaggacattcaggtagcatg                                         |
| 5'-RELA-Spel               | <u>ggactagtg</u> aagccctccaaaagcacttac                              |
| 3'-RELA-Sacl               | cgagctcgaaagagcaagagtccaagtg                                        |
| 5'-NFKBIA-Spel             | <u>ggactagtg</u> atgactgtgtgttggagg                                 |
| 3'-NFKBIA-Sacl             | cgagctcgtacaccatttacaggaggg                                         |
| 5'-IKBKB-Spel              | <u>ggactagtc</u> gcttcctcagcagctgtgac                               |
| 3'-IKBKB-Sacl              | cgagctccttagatgctgtgagagacag                                        |
| 5'-IKBKG-Spel              | <u>ggactagtg</u> cgagatacatgtcatggagtg                              |
| 3'-IKBKG-Sacl              | cgagctcgtccatcaatagtgactgg                                          |
| 5'-TAB1-Spel               | <u>ggactagtc</u> cagtagagtgtgtgagtgcag                              |
| 3'-TAB1-Sacl               | cgagctcggtagctgtgtctcaaagaacc                                       |
| 5'-TAB2-Spel               | <u>ggactagtg</u> aaggtgtgacaagatgggtg                               |
| 3'-TAB2-Sacl               | cgagctccaaacactgtgttgtgtcacc                                        |
| 5'-TRAF2-Spel              | <u>ggactagtc</u> cttcatcaaggccattgtgg                               |
| 3'-TRAF2-Sacl              | cgagctccctaggaatgctcccttctctc                                       |
| 5'-BCL10-Spel              | <u>ggactagtg</u> acccttactaggaagaacg                                |
| 3'-BCL10-Sacl              | cgagctcggaaactccaaaatagcactcac                                      |
| 5'-PIK3CB-Spel             | <u>ggactagtc</u> caagtcagtagacaaaccaacc                             |
| 3'-PIK3CB-NaeI             | gccggcggcattgtgagtaaagagcacag                                       |
| 5'-MALT1-Spel              | <u>ggactagtc</u> acttccaacttactctaggtc                              |
| 3'-MALT1-Sacl              | cgagctccaactatgtatcaactgtgaatac                                     |
| 5'-PLCG1-Spel              | <u>ggactagtg</u> cttagacagaaaccaagcc                                |
| 3'-PLCG1-Sacl              | cgagctcaggatgatttatttggcagtcagatcttaagagg                           |
| 5'-CD3E-Spel               | <u>ggactagtc</u> cctgaatcagagacgcac                                 |
| 3'-CD3E-Sacl               | cgagctcggagatgcaaatgaccatccag                                       |
| <b>mutagenesis primers</b> |                                                                     |
| <b>name</b>                | <b>sequence</b>                                                     |
| 5'-CD3E-BS2mut             | ggactagtcctgaatcagagacgcacatctgaccctctggagaaTCGCGAGtcccgcctggcccagg |
| 3'-CD3E-BS2mut             | cctgggcccagcgggaCTCGGAGttctccagagggtcagatgctctctgattcaggactagtcc    |
| 5'-PIK3CB-mut              | gtttggagaatggtgaaTCGCGAGaggaagaaatggatac                            |
| 3'-PIK3CB-mut              | gtatccatttcttctcctCTCGGAGttcaccattctccaaac                          |
| 5'-PLCG1-BS1mut            | cagcacacacaaaacctTCGCGAGcacatttgggctcag                             |
| 3'-PLCG1-BS1mut            | ctgagcccaaatgtgCTCGGAGaggtttgtgtgtgctg                              |
| 5'-PLCG1-BS2mut            | ccctcttaagatctgAGCGCTGaaataaatcatcctcagctcgcg                       |

|                 |                                                  |
|-----------------|--------------------------------------------------|
| 3'-PLCG1-BS2mut | cgagctcgaggatgatttatttCAGCGCTcagatcttaag<br>aggg |
| 5'-TAB2-mut     | gaaagacttggttgccTCGCGATtaactgtgtacagtg           |
| 3'-TAB2-mut     | cactgtacacagttaaTCGCGAaggcaaccaagtctttc          |
| 5'-NFKBIA-mut   | cttatatccacactgcaTCGCGACTggccaaaacgtc            |
| 3'-NFKBIA-mut   | gacgttttgggcccagTCGCGAtgcagtgatataag             |
